# Supplementary material for: Socioeconomic Inequalities in Disability-free Life Expectancy in Older People from England and the United States: A Cross-national Population-Based Study
Source: PubMed Central journal article supplement (PMC7164527; doi:10.1093/gerona/glz266), 2020-01-15
Supplement: glz266_suppl_supplementary-material.pdf [file glz266_suppl_supplementary-material.pdf]

**Supplement**

**eTable 1 Disability-free life expectancy estimates according to social class in white people, England and United States 2002-2013**

|               | <b>Men</b>                          |                               | <b>Women</b>                        |                               |
|---------------|-------------------------------------|-------------------------------|-------------------------------------|-------------------------------|
|               | <b>England (ELSA) Years (95%CI)</b> | <b>US (HRS) Years (95%CI)</b> | <b>England (ELSA) Years (95%CI)</b> | <b>US (HRS) Years (95%CI)</b> |
| <b>Age 50</b> |                                     |                               |                                     |                               |
| Low grade     | 24.7<br>(23.8; 25.0)                | 25.4<br>(24.2; 26.6)          | 25.8<br>(25.2; 26.4)                | 26.1<br>(24.8; 27.4)          |
| Middle grade  | 28.0<br>(26.8; 28.3)                | 27.6<br>(26.8; 28.4)          | 28.5<br>(27.0; 30.0)                | 29.1<br>(28.5; 29.6)          |
| High grade    | 29.6<br>(29.2; 30.3)                | 29.0<br>(29.1; 29.8)          | 29.3<br>(28.6; 30.4)                | 31.1<br>(30.9; 32.3)          |
| <b>Age 60</b> |                                     |                               |                                     |                               |
| Low grade     | 16.2<br>(15.7; 16.5)                | 17.4<br>(16.4; 17.8)          | 17.3<br>(16.9; 17.7)                | 17.4<br>(16.6; 18.3)          |
| Middle grade  | 18.9<br>(17.7; 19.7)                | 19.3<br>(18.6; 19.8)          | 20.1<br>(19.6; 20.7)                | 20.1<br>(19.7; 20.7)          |
| High grade    | 20.6<br>(20.3; 21.2)                | 21.2<br>(20.6; 21.8)          | 21.9<br>(21.5; 23.2)                | 22.3<br>(21.3; 22.6)          |
| <b>Age 70</b> |                                     |                               |                                     |                               |
| Low grade     | 9.4<br>(8.9; 9.7)                   | 10.4<br>(9.9; 10.7)           | 9.8<br>(9.4; 10.5)                  | 10.3<br>(9.5; 11.2)           |
| Middle grade  | 11.9<br>(11.3; 12.3)                | 11.9<br>(11.3; 12.5)          | 12.4<br>(11.8; 13.0)                | 12.4<br>(12.0; 13.0)          |
| High grade    | 12.7<br>(12.3; 13.1)                | 13.3<br>(12.7; 13.8)          | 13.4<br>(13.2; 14.4)                | 14.0<br>(13.3; 14.4)          |
| <b>Age 80</b> |                                     |                               |                                     |                               |
| Low grade     | 4.8<br>(4.1; 4.9)                   | 5.3<br>(5.0; 5.7)             | 5.1<br>(4.8; 5.3)                   | 5.1<br>(4.5; 5.8)             |
| Middle grade  | 6.0<br>(5.4; 6.6)                   | 6.3<br>(5.9; 7.0)             | 6.7<br>(6.1; 7.3)                   | 6.6<br>(6.4; 7.3)             |
| High          | 6.7<br>(6.4; 7.2)                   | 7.5<br>(7.2; 8.0)             | 7.2<br>(7.0; 8.0)                   | 7.2<br>(6.3; 8.2)             |

**eTable 2 Disability-free life expectancy estimates according to wealth in white people, England and United States 2002-2013**

|                | Men                          |                        | Women                        |                        |
|----------------|------------------------------|------------------------|------------------------------|------------------------|
|                | England (ELSA) Years (95%CI) | US (HRS) Years (95%CI) | England (ELSA) Years (95%CI) | US (HRS) Years (95%CI) |
| <b>Age 50</b>  |                              |                        |                              |                        |
| Poorest wealth | 22.7<br>(22.9; 23.3)         | 22.6<br>(21.6; 23.5)   | 24.4<br>(24.3; 25.3)         | 24.2<br>(23.3; 25.1)   |
| Middle wealth  | 27.6<br>(27.1; 28.1)         | 28.0<br>(27.2; 28.7)   | 30.0<br>(29.5; 30.5)         | 30.1<br>(29.5; 30.7)   |
| Richest wealth | 30.9<br>(30.3; 31.1)         | 31.2<br>(30.9; 31.9)   | 33.1<br>(32.8; 33.3)         | 33.1<br>(32.6; 33.8)   |
| <b>Age 60</b>  |                              |                        |                              |                        |
| Poorest wealth | 14.5<br>(14.3; 15.0)         | 14.8<br>(14.4; 15.2)   | 16.2<br>(16.1; 16.9)         | 15.7<br>(15.3; 16.1)   |
| Middle wealth  | 18.9<br>(18.6; 19.3)         | 19.5<br>(19.1; 20.0)   | 20.8<br>(20.6; 21.0)         | 20.9<br>(20.6; 21.4)   |
| Richest wealth | 22.0<br>(21.5; 22.5)         | 22.3<br>(21.8; 22.8)   | 23.8<br>(23.6; 22.4)         | 24.0<br>(23.5; 24.4)   |
| <b>Age 70</b>  |                              |                        |                              |                        |
| Poorest wealth | 8.3<br>(8.1; 8.6)            | 8.1<br>(7.7; 8.7)      | 9.2<br>(8.9; 9.7)            | 9.0<br>(8.6; 9.4)      |
| Middle wealth  | 11.4<br>(11.2; 11.6)         | 11.7<br>(11.3; 12.2)   | 12.8<br>(12.7; 13.1)         | 13.0<br>(12.5; 13.6)   |
| Richest wealth | 13.7<br>(13.6; 13.8)         | 14.3<br>(13.9; 14.6)   | 15.4<br>(15.1; 15.5)         | 15.4<br>(14.8; 16.0)   |
| <b>Age 80</b>  |                              |                        |                              |                        |
| Poorest wealth | 4.3<br>(4.1; 4.6)            | 4.1<br>(3.8; 4.5)      | 4.8<br>(4.3; 5.1)            | 4.2<br>(3.8; 4.4)      |
| Middle wealth  | 5.8<br>(5.7; 5.9)            | 6.2<br>(5.8; 6.7)      | 6.9<br>(6.4; 7.0)            | 6.8<br>(6.4; 7.4)      |
| Richest wealth | 7.6<br>(7.4; 7.7)            | 7.9<br>(7.4; 8.4)      | 8.9<br>(8.4; 9.2)            | 8.7<br>(8.3; 9.4)      |

**eTable 3 Disability-free life expectancy estimates according to education in white people, England and United States 2002-2013**

|               | Men                         |                        | Women                       |                        |
|---------------|-----------------------------|------------------------|-----------------------------|------------------------|
|               | England<br>Years<br>(95%CI) | US<br>Years<br>(95%CI) | England<br>Years<br>(95%CI) | US<br>Years<br>(95%CI) |
| <b>Age 50</b> |                             |                        |                             |                        |
| Low           | 24.9<br>(24.4; 25.5)        | 24.1<br>(22.7; 25.5)   | 26.7<br>(26.4; 27.3)        | 25.6<br>(24.8; 26.4)   |
| Middle        | 28.6<br>(27.9; 29.2)        | 28.6<br>(27.8; 29.3)   | 30.7<br>(30.4; 31.2)        | 29.9<br>(29.1; 30.7)   |
| High          | 30.7<br>(30.1; 32.3)        | 31.1<br>(30.4; 31.7)   | 33.2<br>(32.5; 34.4)        | 32.9<br>(32.2; 33.6)   |
| <b>Age 60</b> |                             |                        |                             |                        |
| Low           | 16.3<br>(15.8; 16.9)        | 16.6<br>(15.7; 17.2)   | 18.2<br>(17.9; 18.6)        | 16.7<br>(15.9; 17.4)   |
| Middle        | 20<br>(19.4; 20.4)          | 19.9<br>(19.3; 20.5)   | 21.7<br>(21.4; 22.2)        | 20.9<br>(20.5; 21.4)   |
| High          | 21.9<br>(21.2; 23.1)        | 22.6<br>(21.7; 23.1)   | 23.9<br>(23.2; 25.1)        | 23.6<br>(23.0; 24.7)   |
| <b>Age 70</b> |                             |                        |                             |                        |
| Low           | 9.6<br>(9.2; 10.1)          | 9.2<br>(8.7; 9.6)      | 10.6<br>(10.4; 11.1)        | 9.3<br>(8.8; 9.6)      |
| Middle        | 12.4<br>(11.4; 13.0)        | 12.2<br>(11.9; 12.4)   | 13.7<br>(13.4; 14.2)        | 12.9<br>(12.6; 13.2)   |
| High          | 13.9<br>(13.1; 14.8)        | 14.2<br>(13.4; 14.8)   | 15.5<br>(14.8; 16.6)        | 14.9<br>(14.2; 15.7)   |
| <b>Age 80</b> |                             |                        |                             |                        |
| Low           | 4.9<br>(4.6; 5.2)           | 5.0<br>(4.6; 5.5)      | 5.5<br>(5.3; 6.0)           | 4.9<br>(4.5; 5.5)      |
| Middle        | 6.9<br>(6.6; 7.2)           | 6.7<br>(6.2; 7.2)      | 7.8<br>(7.3; 8.2)           | 6.8<br>(6.4; 7.4)      |
| High          | 7.8<br>(7.3; 8.2)           | 8.0<br>(7.6; 8.9)      | 8.5<br>(5.5; 9.7)           | 8.2<br>(7.7; 9.4)      |

**eTable 4 Disability-free life expectancy according to the relative index of inequalities for social class, England and United States 2002-2013**

|                      | Men                          |                        | Women                        |                        |
|----------------------|------------------------------|------------------------|------------------------------|------------------------|
|                      | England (ELSA) Years (95%CI) | US (HRS) Years (95%CI) | England (ELSA) Years (95%CI) | US (HRS) Years (95%CI) |
| <b>Age 50</b>        |                              |                        |                              |                        |
| Low grade RII=0.85   | 24.3<br>(23.9; 25.0)         | 25.2<br>(24.3; 25.7)   | 25.5<br>(24.9; 26.1)         | 26.0<br>(25.4; 26.3)   |
| Middle grade RII=0.5 | 27.0<br>(26.5; 27.5)         | 27.6<br>(26.7; 27.9)   | 28.5<br>(28.0; 28.8)         | 28.5<br>(28.0; 28.7)   |
| High grade RII=0.15  | 29.8<br>(29.1; 30.2)         | 29.7<br>(29.3; 30.6)   | 31.3<br>(30.7; 31.9)         | 31.0<br>(30.7; 31.4)   |
| <b>Age 60</b>        |                              |                        |                              |                        |
| Low grade RII=0.85   | 15.9<br>(15.3; 16.3)         | 16.9<br>(16.6; 17.4)   | 17.1<br>(16.5; 17.5)         | 17.2<br>(16.7; 17.6)   |
| Middle grade RII=0.5 | 18.2<br>(17.5; 18.6)         | 18.9<br>(18.6; 19.4)   | 19.6<br>(19.1; 19.8)         | 19.5<br>(19.1; 19.7)   |
| High grade RII=0.15  | 20.9<br>(20.2; 21.2)         | 21.0<br>(20.7; 21.6)   | 22.2<br>(21.7; 22.5)         | 21.9<br>(21.5; 22.4)   |
| <b>Age 70</b>        |                              |                        |                              |                        |
| Low grade RII=0.85   | 9.2<br>(8.8; 9.6)            | 10.2<br>(9.8; 10.4)    | 9.6<br>(9.0; 9.9)            | 10.3<br>(9.7; 10.5)    |
| Middle grade RII=0.5 | 11.3<br>(10.8; 11.7)         | 11.6<br>(11.2; 11.8)   | 12.0<br>(11.4; 12.3)         | 12.0<br>(11.5; 12.3)   |
| High grade RII=0.15  | 12.8<br>(11.9; 13.3)         | 13.3<br>(13.0; 13.7)   | 13.7<br>(13.1; 14.4)         | 13.8<br>(13.4; 14.4)   |
| <b>Age 80</b>        |                              |                        |                              |                        |
| Low grade RII=0.85   | 4.6<br>(4.2; 4.9)            | 5.2<br>(5.0; 5.4)      | 4.9<br>(4.6; 5.4)            | 4.7<br>(4.2; 5.3)      |
| Middle grade RII=0.5 | 5.6<br>(5.1; 6.0)            | 6.3<br>(5.8; 6.5)      | 6.3<br>(5.8; 6.7)            | 6.5<br>(6.2; 6.7)      |
| High grade RII=0.15  | 6.8<br>(6.3; 7.2)            | 7.5<br>(7.3; 8.0)      | 7.3<br>(6.6; 8.0)            | 7.2<br>(6.5; 7.5)      |

**eTable 5 Disability-free life expectancy according to the relative index of inequalities for education, England and United States 2002-2013**

|                | Men                                |                              | Women                                 |                              |
|----------------|------------------------------------|------------------------------|---------------------------------------|------------------------------|
|                | England<br>(ELSA)<br>Years (95%CI) | US (HRS)<br>Years<br>(95%CI) | England<br>(ELSA)<br>Years<br>(95%CI) | US (HRS)<br>Years<br>(95%CI) |
| <b>Age 50</b>  |                                    |                              |                                       |                              |
| Low RII=0.85   | 23.8<br>(23.5; 24.5)               | 24.1<br>(23.6; 24.7)         | 25.6<br>(24.9; 26.1)                  | 24.9<br>(24.0; 25.4)         |
| Middle RII=0.5 | 26.8<br>(26.4; 27.4)               | 27.6<br>(27.2; 28.1)         | 28.9<br>(28.5; 29.4)                  | 28.8<br>(28.2; 29.2)         |
| High RII=0.15  | 29.9<br>(29.5; 30.9)               | 30.8<br>(30.2; 31.5)         | 32.1<br>(31.6; 32.9)                  | 32.5<br>(31.8; 33.1)         |
| <b>Age 60</b>  |                                    |                              |                                       |                              |
| Low RII=0.85   | 15.6<br>(15.2; 15.9)               | 15.9<br>(15.5; 16.4)         | 17.4<br>(16.7; 17.8)                  | 16.3<br>(15.9; 16.8)         |
| Middle RII=0.5 | 18.3<br>(18.1; 18.8)               | 19.0<br>(18.7; 19.4)         | 20.0<br>(19.7; 20.7)                  | 19.9<br>(19.4; 20.4)         |
| High RII=0.15  | 21.1<br>(20.6; 22.0)               | 22.0<br>(21.6; 22.5)         | 22.7<br>(22.6; 23.9)                  | 23.3<br>(22.5; 23.9)         |
| <b>Age 70</b>  |                                    |                              |                                       |                              |
| Low RII=0.85   | 9.1<br>(8.7; 9.4)                  | 9.2<br>(8.9; 9.8)            | 10.0<br>(9.6; 10.3)                   | 9.4<br>(9.1; 9.8)            |
| Middle RII=0.5 | 11.2<br>(10.9; 11.7)               | 11.9<br>(11.7; 12.2)         | 12.4<br>(11.9; 12.7)                  | 12.5<br>(12.1; 12.9)         |
| High RII=0.15  | 13.1<br>(12.9; 14.1)               | 14.3<br>(13.8; 14.6)         | 14.9<br>(14.2; 15.7)                  | 15.0<br>(14.5; 15.6)         |
| <b>Age 80</b>  |                                    |                              |                                       |                              |
| Low RII=0.85   | 4.6<br>(4.3; 4.9)                  | 4.9<br>(4.6; 5.5)            | 5.2<br>(4.9; 5.6)                     | 4.8<br>(4.4; 5.3)            |
| Middle RII=0.5 | 6.2<br>(5.7; 6.7)                  | 6.4<br>(6.2; 7.0)            | 6.9<br>(6.7; 7.4)                     | 6.5<br>(6.0; 6.9)            |
| High RII=0.15  | 7.3<br>(6.6; 7.9)                  | 8.2<br>(7.7; 8.7)            | 7.8<br>(7.3; 9.1)                     | 8.0<br>(7.5; 8.7)            |
